# Supplementary material for: Metabolomic and Proteomic Profiles Associated With Ketosis in Dairy Cows
Source: Front Genet. 2020 Dec 16;11:551587. doi: 10.3389/fgene.2020.551587 (PMC7772412; doi:10.3389/fgene.2020.551587)
Supplement: Supplementary file 4 [file Table_4.XLS]

## Sheet: Table S5 Differential metabolit
Table S4. Differentially accumulated metabolites identified between CK and PCK groups.
name	mz	rt	formula	exact_mass	KEGG	ppm	VIP	FoldChange	log2FC	pvalue
(4S)-4-Hydroxy-L-Isoleucine	148.096	106.362	C6H13NO3	147.172		2	1.63463	1.4721	0.55787	0.000508878
(R)-2-Hydroxy-4-Methylpentanoic acid	131.07	193.42	C6H12O3	132.158	C03264	4	1.21766	1.7	0.76556	0.00942377
(R)-Pantothenic acid	220.118	365.111	C9H17NO5	219.235	C00864	1	1.66562	1.6309	0.70571	0.000346554
1-Aminocyclohexanecarboxylic acid	144.102	161.562	C7H13NO2	143.095		0	1.17944	3.4341	1.78	0.0235357
11-trans-LTD4	495.258	542.251	C25H40N2O6S	496.261		9	1.63351	6.762	2.7575	7.74e-05
2-(4-Morpholinyl)Benzothiazole	221.074	720.698	C11H12N2OS	220.067		0	1.59618	1.3946	0.47989	0.000794468
2-Hydroxymyristic acid	243.196	749.253	C14H28O3	244.37		1	1.43782	2.3387	1.2257	0.00119815
2,3-Dihydroxybenzoic acid	153.018	445.598	C7H6O4	154.12	C00196	9	1.62191	6.6894	2.7419	9.45e-05
3-Carboxypropyl Trimethylammonium	146.118	102.481	C7H15NO2	145.11		1	1.79922	0.68716	-0.54129	4.76e-05
3-Hydroxy-3-Methylglutaric acid	161.045	93.7447	C6H10O5	162.141	C03761	10	1.08719	0.71765	-0.47865	0.0237158
3-Methyl-L-Histidine	168.077	105.316	C7H11N3O2	169.181	C01152	6	1.15435	1.2156	0.2817	0.0150759
4-Hydroxy-6-Methylpyran-2-one	125.023	183.865	C6H6O3	126.11	C02752	9	1.82073	8.8886	3.152	9.09e-07
4-Hydroxybenzaldehyde	123.044	242.312	C7H6O2	122.121	C00633	3	1.41952	0.71639	-0.48118	0.0043532
4-Pyridoxic acid	182.045	353.242	C8H9NO4	183.161	C00847	7	1.1104	1.3347	0.41649	0.0203774
5-Hydroxyindoleacetic acid	190.05	331.269	C10H9NO3	191.183	C05635	3	1.16853	0.58966	-0.76204	0.0136218
8-Iso PGF3-Alpha	351.22	793.192	C20H32O5	352.225		7	1.29676	0.45067	-1.1498	0.00489467
9(S)-Hpode	311.223	797.691	C18H32O4	312.444	C14827	1	1.32928	1.8768	0.90829	0.00364594
Acetoin	89.0604	96.4794	C4H8O2	88.1051	C00466	9	1.7411	1.7766	0.82915	0.000121727
Benzothiazole	136.021	676.879	C7H5NS	135.187		2	2.03379	0.68505	-0.54572	1.08e-07
Beta-Hydroxy Butyric acid	103.039	96.5024	C4H8O3	104.105	C01089	15	1.86088	5.8253	2.5423	2.1e-07
Biliverdin	583.253	741.265	C33H34N4O6	582.646	C00500	1	1.18006	1.992	0.9942	0.0234499
Cinnamoylglycine	206.082	565.681	C11H11NO3	205.21		2	1.91092	4.9193	2.2984	4.89e-06
Citrulline	174.088	94.4677	C6H13N3O3	175.186	C00327	9	1.34363	0.74475	-0.42518	0.00318489
Creatine	132.102	103.68	C4H9N3O2	131.133	C00300	16	1.62253	0.67651	-0.56382	0.000587549
Cytarabine	244.093	103.82	C9H13N3O5	243.217	C02961	0	1.58134	2.0729	1.0516	0.000935657
Cytosine	112.051	103.906	C4H5N3O	111.102	C00380	6	1.55196	1.8887	0.91742	0.00127727
Dihydro-3-Coumaric acid	165.055	340.743	C9H10O3	166.174	C11457	6	1.02107	1.1919	0.25325	0.0356004
DL-B-Hydroxycaprylic acid	159.102	461.213	C8H16O3	160.11		6	1.15456	1.5937	0.67234	0.0150531
DL-Methionine Sulfoxide	166.053	174.18	C5H11NO3S	165.212		1	1.49948	0.76159	-0.39292	0.00214398
Dropropizine	237.158	504.688	C13H20N2O2	236.311		10	1.33973	1.1055	0.14467	0.00813532
Erlotinib	394.183	642.134	C22H23N3O4	393.436		17	1.18335	0.34763	-1.5244	0.0229945
erythro-Sphingosine C-17	286.274	781.072	C17H35NO2	285.267		0	1.82846	5.876	2.5548	2.81e-05
ethyl 2-Cyano-3-(1H-Indol-3-YL)Prop-2-enoate	239.083	718.532	C14H12N2O2	240.09		0	1.26396	2.0778	1.055	0.00648687
Galactitol	180.972	91.4158	C6H14O6	182.172	C01697	5	1.23824	0.93725	-0.093491	0.00800894
Glutaric acid	131.034	93.7712	C5H8O4	132.115	C00489	8	1.75457	0.63272	-0.66036	6.13e-06
Glycerophosphocholine	258.11	91.5302	C8H20NO6P	257.221	C00670	2	1.41037	1.2821	0.35846	0.00469485
Glycocholic acid	464.298	613.969	C26H43NO6	465.623	C01921	7	1.14334	2.1689	1.117	0.016287
Hippuric acid	178.049	352.851	C9H9NO3	179.173	C01586	10	1.1667	0.64256	-0.6381	0.0138028
L-a-Lysophosphatidylserine	524.298	832.264	C24H48NO9P	525.307		3	1.04672	1.7048	0.76958	0.0305428
L-Alpha-Hydroxyisovaleric acid	117.054	159.906	C5H10O3	118.063		12	1.73184	2.0703	1.0499	1.07e-05
L-Arginine	173.103	96.0118	C6H14N4O2	174.201	C00062	9	1.44365	0.77005	-0.37697	0.00112135
L-Aspartic acid	132.029	83.1195	C4H7NO4	133.103	C00049	13	1.45145	0.51808	-0.94875	0.00102496
L-Cystine	239.129	795.623	C6H12N2O4S2	240.303	C00491	3	1.10167	1.3781	0.46268	0.0215865
L-Glutamic acid	148.06	93.8659	C5H9NO4	147.129	C00025	5	1.62098	0.55563	-0.84781	0.000598304
L-Glutamine	147.076	90.9946	C5H10N2O3	146.145	C00064	1	1.66428	0.72422	-0.4655	0.000352542
L-Histidine	156.077	87.967	C6H9N3O2	155.155	C00135	0	1.74467	0.6753	-0.56639	0.000115329
L-Kynurenine	209.092	347.486	C10H12N2O3	208.214	C00328	5	1.30329	0.57572	-0.79657	0.0105767
L-Malic acid	133.013	79.9462	C4H6O5	134.087	C00149	7	1.05486	1.3041	0.3831	0.0290617
L-Ornithine	133.097	81.0094	C5H12N2O2	168.62	C00077	4	1.83068	0.57698	-0.7934	2.7e-05
L-Pipecolic acid	130.087	104.221	C6H11NO2	129.157	C00408	9	1.96972	4.269	2.0939	1.01e-06
L-Tyrosine	180.066	191.347	C9H11NO3	181.189	C00082	4	1.02667	0.7267	-0.46056	0.0344453
Methyl Arachidonate	319.266	71.7678	C21H34O2	318.493		8	1.43779	1.9233	0.9436	0.00373174
N-Epsilon-Acetyl-L-Lysine	189.124	161.554	C8H16N2O3	188.224	C02727	1	1.25166	1.2842	0.36081	0.0150039
N-Palmitoyl Glycine	312.254	828.252	C18H35NO3	313.476		0	1.74973	3.217	1.6857	6.92e-06
N-Pentadecylamine	228.269	782.544	C15H33N	227.429		0	1.6782	2.9252	1.5485	0.000294479
N,N-Dimethylglycine	104.071	100.606	C4H9NO2	103.12	C01026	11	1.92772	2.4755	1.3077	3.22e-06
Nonanedioic acid	187.096	223.283	C9H16O4	188.221	C08261	7	1.18323	0.70958	-0.49497	0.0122346
p-Chlorophenylalanine	200.047	409.287	C9H10ClNO2	199.04		1	1.56542	1.0397	0.056219	0.00110981
p-Cresol	107.049	478.478	C7H8O	108.138	C01468	15	1.06475	0.50493	-0.98585	0.027335
p-Tolyl Sulfate	187.006	478.49	C7H8O4S	188.014		4	1.01153	0.55654	-0.84544	0.0376361
Palmitic amide	256.263	726.871	C16H33NO	255.44		3	1.18315	0.64917	-0.62334	0.0230209
PGB2	333.207	741.616	C20H30O4	334.45	C05954	1	1.79196	0.11237	-3.1537	2.22e-06
Phosphatidylinositol Lyso 18:0	599.317	830.115	C27H53O12P	600.327		5	1.55284	2.5053	1.325	0.000277244
Phytanic acid	311.296	839.236	C20H40O2	312.53	C01607	1	1.18588	1.5951	0.67367	0.0119969
Pristanic acid	299.294	73.0866	C19H38O2	298.504		1	1.35642	1.8628	0.89751	0.00718067
Pyruvate	87.0076	94.6794	C3H4O3	88.0621	C00022	14	1.69872	0.61672	-0.6973	2.22e-05
Salicyluric acid	194.045	392.57	C9H9NO4	195.172	C07588	3	1.62289	9.0101	3.1715	9.29e-05
Sarcosine	90.0555	91.4906	C3H7NO2	89.0932	C00213	8	1.43975	0.68707	-0.54147	0.00366954
Sebacic acid	201.113	375.7	C10H18O4	202.248	C08277	2	1.13862	0.77409	-0.36943	0.01683
Ser-His-OH	365.105	95.1839	C15H16N4O7	364.102		12	1.99366	5.8353	2.5448	4.72e-07
Succinic acid	117.018	79.8535	C4H6O4	118.088	C00042	14	1.37288	1.3796	0.46421	0.00239245
Succinic acid Semialdehyde	101.023	94.6483	C4H6O3	102.089	C00232	12	1.67674	2.5305	1.3394	3.47e-05
Tetradecylamine	214.253	780.243	C14H31N	213.246		1	1.49168	1.5831	0.66275	0.00230674
Thymine	127.051	345.607	C5H6N2O2	126.113	C00178	2	1.51384	1.4846	0.57009	0.00186917
Triethyl Phosphate	183.079	611.262	C6H15O4P	182.155		2	1.86758	0.33732	-1.5678	1.29e-05
Vanillin	151.039	614.21	C8H8O3	152.147	C00755	6	1.37581	1.3981	0.48344	0.002323
